# Supplementary material for: Optical Redox Imaging of Treatment Responses to Nampt Inhibition and Combination Therapy in Triple-Negative Breast Cancer Cells
Source: MDPI journal article supplement (doi:10.3390/ijms22115563), 2021-05-25
Supplement: s1 [file s1]

## Supplementary materials

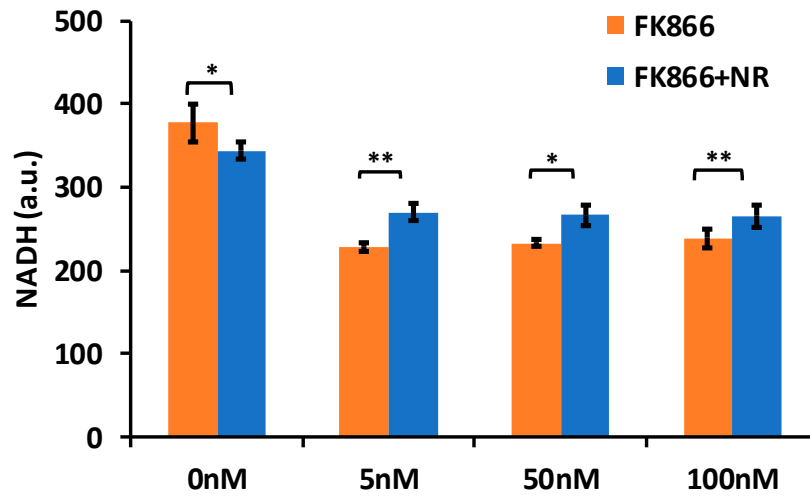

**Figure S1.** NR rescue effect on HCC1806 cells. Six hours NR treatment effects are nearly equivalent at various concentrations of FK866 ranging from 5 nM to 100 nM. Dishes were treated for 48 hours with FK866 (or 0.1% DMSO for control represented by 0 nM) with NR (0.8 mM) added after the first 42 hours of FK866 treatment ( $n \geq 3$ ) (Unpaired t-test, \*  $p < 0.05$  and \*\*  $p < 0.01$ ).
